# Supplementary material for: Comparative glycosylation mapping of plasma-derived and recombinant human factor VIII
Source: PLOS journal article supplement (doi:10.1371/journal.pone.0233576), 2020-05-22
Supplement: S2 (10.1371/journal.pone.0233576.s002) [file journal.pone.0233576.s002]

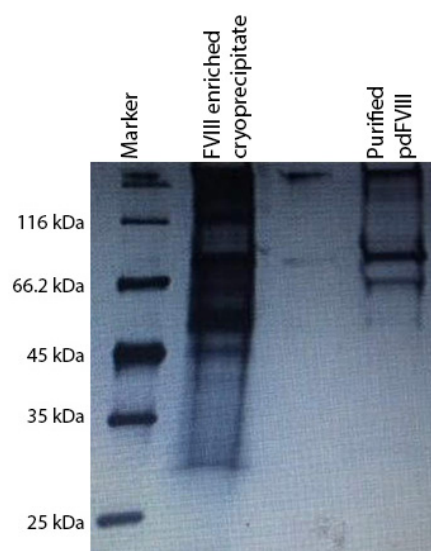

**S2 Fig.** SDS-PAGE of FVIII enriched cryoprecipitate and purified plasma derived FVIII. The FVIII enriched cryoprecipitate was obtained from Shanghai Lai Shi Blood Products Co., Ltd.
